# Supplementary material
Source: MDPI journal article supplement (https://www.mdpi.com/2076-3263/13/3/71)

# **SUPPLEMENT TO:**

## **The relative stability of planktic foraminifer thermal preferences over the past 3 million years**

Harry Dowsett<sup>1</sup>, Marci Robinson<sup>1</sup>, Kevin Foley<sup>1</sup>, Timothy Herbert<sup>2</sup>,  
Stephen Hunter<sup>3</sup>, Carin Andersson<sup>4</sup>, Whittney Spivey<sup>1</sup>

<sup>1</sup> U.S. Geological Survey, Florence Bascom Geoscience Center, Reston, Virginia, USA

<sup>2</sup> Department of Earth, Environmental and Planetary Sciences, Brown University, Providence, Rhode Island, USA

<sup>3</sup> School of Earth and Environment, University of Leeds, Leeds, West Yorkshire, UK

<sup>4</sup> NORCE Norwegian Research Centre, Bjerknes Centre for Climate Research, Bergen, Norway

**Figure S1.** Relative abundance of species

**Figure S2.** Distribution of Pliocene SST estimates by core site

**Table S1.** Summary SST statistics for localities

**Table S2.** Summary SST statistics for taxa

**Table S3.** Pliocene sites shown in Figure S1

**Table S4.** Faunal census data from ODP Site 642

**Taxonomy**

**References**

**Figure S1. Relative abundance of species.**

Maps show mean relative abundance in North Atlantic of mid-Piacenzian species (red dots; See Table S3) on a background of coretop abundances (blue dots) from the ForCenS database. Scale at lower right is the same for all plots and shows 100%, 75%, 50%, and 25% relative abundance.

Box plots showing distribution of Pliocene SST's within each core and range of temperatures between cores.

| Table S1. Summary SST statistics (localities) |          |          |           |              |              |               |          |  |
|-----------------------------------------------|----------|----------|-----------|--------------|--------------|---------------|----------|--|
| Site                                          | lat (°N) | lon (°E) | n samples | min SST (°C) | max SST (°C) | mean SST (°C) | $\sigma$ |  |
| 552                                           | 56.04    | -23.23   | 15        | 14.0         | 19.4         | 16.9          | 1.51     |  |
| 603                                           | 35.50    | -70.03   | 9         | 21.7         | 23.6         | 22.5          | 0.67     |  |
| 606                                           | 37.34    | -35.50   | 25        | 20.2         | 24.4         | 22.6          | 1.07     |  |
| 607                                           | 41.00    | -32.96   | 12        | 20.1         | 22.5         | 21.3          | 0.91     |  |
| 609                                           | 49.88    | -24.24   | 23        | 15.5         | 20.2         | 17.9          | 1.24     |  |
| 625                                           | 28.83    | -87.16   | 24        | 26.1         | 27.7         | 27.1          | 0.39     |  |
| 642*                                          | 67.22    | 2.93     | 13        | 11.5         | 14.4         | 12.9          | 0.88     |  |
| 662                                           | -1.39    | -11.74   | 16        | 26.9         | 27.4         | 27.2          | 0.14     |  |
| 925                                           | 4.20     | -43.49   | 23        | 27.0         | 29.0         | 28.6          | 0.46     |  |
| 951                                           | 32.03    | -24.87   | 21        | 23.0         | 25.8         | 24.2          | 0.96     |  |
| 958                                           | 24.00    | -20.00   | 24        | 23.2         | 26.0         | 24.6          | 0.87     |  |
| 982                                           | 57.52    | -15.87   | 28        | 13.4         | 20.6         | 17.5          | 2.00     |  |
| 999                                           | 12.74    | -78.74   | 6         | 27.5         | 27.9         | 27.7          | 0.16     |  |
| 1006                                          | 24.40    | -79.46   | 5         | 28.0         | 28.7         | 28.4          | 0.31     |  |
| 1062                                          | 28.25    | -74.41   | 9         | 22.7         | 23.9         | 23.6          | 0.41     |  |
| 1063                                          | 33.69    | -57.62   | 23        | 21.3         | 23.6         | 22.7          | 0.54     |  |
| 1115                                          | -9.19    | 151.57   | 23        | 28.7         | 29.0         | 28.9          | 0.09     |  |
| 1308                                          | 49.88    | -24.24   | 37        | 15.8         | 19.7         | 18.1          | 1.05     |  |
| 1313                                          | 41.00    | -32.96   | 16        | 17.8         | 21.4         | 19.2          | 1.23     |  |
| *Alkenone data from Bachem et al. (2016).     |          |          |           |              |              |               |          |  |

**Table S2. Summary SST statistics for taxa.** Columns list species, number of samples each species occurs in within the 341 sample Pliocene data set, minimum SST, maximum SST, mean SST, standard deviation, and qualitative temperature preference.

|  |                                                   |                  |                 |                 |                  |          |                          |  |
|--|---------------------------------------------------|------------------|-----------------|-----------------|------------------|----------|--------------------------|--|
|  |                                                   |                  |                 |                 |                  |          |                          |  |
|  | Table S2. Summary SST statistics ( Pliocene taxa) |                  |                 |                 |                  |          |                          |  |
|  | species                                           | n<br>sample<br>s | min<br>SST (°C) | max<br>SST (°C) | mean SST<br>(°C) | $\sigma$ | Dowsett et al.<br>(2021) |  |
|  | <i>Dentoglobigerina altispira</i>                 | 199              | 17.4            | 29.0            | 25.0             | 3.21     | warm                     |  |
|  | <i>Globigerina bulloides</i>                      | 355              | 5.2             | 29.0            | 21.5             | 5.53     | transitional             |  |
|  | <i>Globigerinita glutinata</i>                    | 358              | 6.3             | 29.0            | 21.5             | 5.48     | warm-transitional        |  |
|  | <i>Globoconella puncticulata</i>                  | 260              | 13.8            | 29.0            | 21.6             | 3.81     | transitional             |  |
|  | <i>Globorotalia menardii</i>                      | 188              | 16.9            | 29.0            | 25.7             | 2.66     | warm                     |  |
|  | <i>Neogloboquadrina atlantica</i> (s)             | 128              | 5.2             | 27.7            | 16.1             | 4.48     | cool-transitional        |  |
|  | <i>Neogloboquadrina dutertrei</i>                 | 91               | 13.8            | 29.0            | 25.2             | 4.54     | warm-transitional        |  |
|  | <i>Neogloboquadrina incompta</i>                  | 288              | 6.3             | 29.0            | 21.7             | 5.60     | transitional             |  |
|  | <i>Neogloboquadrina pachyderma</i>                | 195              | 6.3             | 29.0            | 19.9             | 5.82     | cool                     |  |
|  | <i>Trilobatus sacculifer</i>                      | 230              | 17.0            | 29.0            | 24.8             | 3.23     | warm                     |  |
|  |                                                   |                  |                 |                 |                  |          |                          |  |

**Table S3. Pliocene sites shown in Figure S1.**

| Table S3. Pliocene sites shown in Figure S1. |          |          |                         |      |          |          |                       |
|----------------------------------------------|----------|----------|-------------------------|------|----------|----------|-----------------------|
| Site                                         | lat (°N) | lon (°E) | Faunal data             | Site | lat (°N) | lon (°E) | Faunal data           |
| 111                                          | 50.43    | -46.37   | Dowsett et al. (2015)   | 659  | 18.08    | -21.03   | Dowsett et al. (2015) |
| 396                                          | 22.48    | -43.52   | Dowsett et al. (2015)   | 661  | 9.45     | -19.39   | Dowsett et al. (2015) |
| 410                                          | 45.51    | -29.48   | Dowsett et al. (2015)   | 662  | -1.39    | -11.74   | Dowsett et al. (2019) |
| 502                                          | 11.49    | -79.38   | Dowsett et al. (2015)   | 667  | 4.57     | -21.91   | Dowsett et al. (2015) |
| 546                                          | 33.78    | -9.56    | Dowsett et al. (2015)   | 672  | 15.54    | -58.64   | Dowsett et al. (2015) |
| 548                                          | 48.92    | -12.16   | Loubere and Moss (1986) | 925  | 4.20     | -43.49   | Dowsett et al. (2015) |
| 552                                          | 56.04    | -23.23   | Dowsett et al. (2015)   | 951  | 32.03    | -24.87   | Dowsett et al. (2015) |
| 603                                          | 35.50    | -70.03   | Dowsett et al. (2015)   | 958  | 24.00    | -20.00   | Dowsett et al. (2015) |
| 606                                          | 37.34    | -35.50   | Dowsett et al. (2015)   | 981  | 55.48    | -14.65   | Dowsett et al. (2015) |
| 607                                          | 41.00    | -32.96   | Dowsett et al. (2015)   | 982  | 57.52    | -15.87   | Dowsett et al. (2019) |
| 608                                          | 42.84    | -23.09   | Dowsett et al. (2015)   | 999  | 12.74    | -78.74   | Dowsett et al. (2019) |
| 609                                          | 49.88    | -24.24   | Dowsett et al. (2015)   | 1006 | 24.40    | -79.46   | Dowsett et al. (2015) |
| 610                                          | 53.22    | -18.89   | Dowsett et al. (2015)   | 1062 | 28.25    | -74.41   | Dowsett et al. (2015) |
| 625                                          | 28.83    | -87.16   | Dowsett et al. (2015)   | 1063 | 33.69    | -57.62   | Dowsett et al. (2015) |
| 642                                          | 67.23    | 2.93     | Andersson, unpublished  | 1308 | 49.88    | -24.24   | Dowsett et al. (2019) |
| 646                                          | 58.21    | -48.37   | Dowsett et al. (2015)   | 1313 | 41.00    | -32.96   | Dowsett et al. (2019) |
|                                              |          |          |                         |      |          |          |                       |

**Table S4. Faunal census data from ODP Site 642.**

| Table S4. Relative faunal abundances at ODP Site 642B |                     |                     |                      |                      |                       |                     |                        |                    |                      |  |
|-------------------------------------------------------|---------------------|---------------------|----------------------|----------------------|-----------------------|---------------------|------------------------|--------------------|----------------------|--|
| Depth (m)                                             | <i>D. altispira</i> | <i>G. bulloides</i> | <i>Gt. glutinata</i> | <i>T. sacculifer</i> | <i>Gt. punctulata</i> | <i>Gt. menardii</i> | <i>N. atlantica[s]</i> | <i>N. incompta</i> | <i>N. pachyderma</i> |  |
| 67.18                                                 | 0.0000              | 0.0690              | 0.0320               | 0.0000               | 0.0000                | 0.0000              | 0.8450                 | 0.0000             | 0.0000               |  |
| 67.19                                                 | 0.0000              | 0.0180              | 0.0240               | 0.0000               | 0.0000                | 0.0000              | 0.8440                 | 0.0000             | 0.0000               |  |
| 67.40                                                 | 0.0000              | 0.0100              | 0.0700               | 0.0000               | 0.0000                | 0.0000              | 0.8580                 | 0.0020             | 0.0050               |  |
| 67.46                                                 | 0.0000              | 0.0160              | 0.0290               | 0.0000               | 0.0000                | 0.0000              | 0.8880                 | 0.0000             | 0.0000               |  |
| 67.52                                                 | 0.0000              | 0.0170              | 0.0030               | 0.0000               | 0.0000                | 0.0000              | 0.9240                 | 0.0000             | 0.0166               |  |
| 67.56                                                 | 0.0000              | 0.0090              | 0.0020               | 0.0000               | 0.0000                | 0.0000              | 0.9550                 | 0.0000             | 0.0000               |  |
| 67.61                                                 | 0.0000              | 0.0000              | 0.0020               | 0.0000               | 0.0000                | 0.0000              | 0.9670                 | 0.0000             | 0.0045               |  |
| 67.65                                                 | 0.0000              | 0.0040              | 0.0830               | 0.0000               | 0.0000                | 0.0000              | 0.4380                 | 0.1400             | 0.2562               |  |
| 67.66                                                 | 0.0000              | 0.0280              | 0.0060               | 0.0000               | 0.0000                | 0.0000              | 0.9340                 | 0.0000             | 0.0000               |  |
| 67.71                                                 | 0.0000              | 0.0040              | 0.0090               | 0.0000               | 0.0000                | 0.0000              | 0.9550                 | 0.0000             | 0.0000               |  |
| 67.76                                                 | 0.0000              | 0.0500              | 0.0170               | 0.0000               | 0.0000                | 0.0000              | 0.9090                 | 0.0000             | 0.0000               |  |
| 67.81                                                 | 0.0000              | 0.0120              | 0.0080               | 0.0000               | 0.0000                | 0.0000              | 0.9450                 | 0.0000             | 0.0000               |  |
| 67.85                                                 | 0.0000              | 0.0280              | 0.0130               | 0.0000               | 0.0000                | 0.0000              | 0.9120                 | 0.0000             | 0.0026               |  |

---

## Taxonomy

### ***Dentoglobigerina altispira*** (Cushman & Jarvis, 1936)

Cushman, J. A. & Jarvis, P. W. (1936). Three new foraminifera from the Miocene Bowden Marl of Jamaica. *Contributions from the Cushman Laboratory for Foraminiferal Research*. **12**(1): 3-5.

Pliocene census data include specimens of *Dentoglobigerina globosa* (Bolli, 1957) that have slightly more rounded chambers.

### ***Globigerina bulloides*** d'Orbigny, 1826

d'Orbigny, A. (1826). Tableau methodique de la Classe de Cephalopodes. *Annales des Sciences Naturelles, Paris*. **7**: 245-314.

### ***Trilobatus sacculifer*** (Brady, 1877)

Brady, H. B. (1877). Supplementary note on the foraminifera of the Chalk (?) of the New Britain group. *Geological Magazine*. **4**(12): 534-536.

Pliocene assemblages include specimens of *Trilobatus quadrilobatus* (d'Orbigny, 1846), *Trilobatus immaturus* (LeRoy, 1939), and *Trilobatus trilobus* (Reuss, 1850), thus the equatorial periphery ranges from triangular to subquadrate to lobate, and the degree of chamber embracing and coil tightness is variable. *Globigerinoidesella fistulosa* (Schubert, 1910) is not included. ForCenS data include *Trilobatus trilobus* (Reuss, 1850).

### ***Globigerinita glutinata*** (Egger, 1893)

Egger, J. G. (1893). Foraminiferen aus Meeresgrundproben, gelothet von 1874 bis 1876 von S. M. Sch. Gazelle. *Abhandlugen der königlichen bayerischen Akademie Wissenschaften zu München, mathematische - naturwissenschaftliche Klasse*. **18**(2): 195-457.

This Pliocene category includes any rare specimens of with supplementary apertures along spiral sutures and *Globigerinita uvula* (Ehrenberg, 1862) with high trochospiral coiling. We commonly recognized specimens both with and without a bulla.

### ***Globoconella puncticulata*** (Deshayes, 1832)

Deshayes, G. P. (1832). *Encyclopedie methodique: Histoire Naturelle des Vers., Tome 2.* Agasse Imprimeur, Paris. 1-594.

Pliocene census data include any specimens attributable to *Globoconella conomiozea* (Kennett, 1966) with *G. puncticulata*.

***Globoconella inflata*** (d'Orbigny, 1839)

d'Orbigny, A. (1839). Foraminifères des Iles Canaries. In, Barker-Webb, P. & Berthelot, S. (eds) *Histoire naturelle des Iles Canaries*. 120-146.

***Globorotalia menardii*** (Parker, Jones & Brady, 1865 after d'Orbigny, 1826 nomen nudum)

Parker, W. K., Jones, T. R. & Brady, H. B. (1865). On the nomenclature of the foraminifera. X cont: The Species enumerated by d'Orbigny in the 'Annales des Sciences Naturelles', vol. 7, 1826 (The Species illustrated by Models. *Annals and Magazine of Natural History*. **3**(16): 15-41.

d'Orbigny, A. (1826). Tableau methodique de la Classe de Cephalopodes. *Annales des Sciences Naturelles, Paris*. **7**: 245-314.

Pliocene census data include these other species from the *Globorotalia menardii* lineage: *Globorotalia limbata* (Fornasini, 1902) with "hockey-stick" shaped dorsal intercameral sutures, *Globorotalia miocenica* Palmer (1945) with its circular outline, *Globorotalia pseudomiocenica* Bolli & Bermudez (1965) with its strongly biconvex test, and thinner and more delicate *Globorotalia exilis* Blow (1969) and *Globorotalia pertenuis* Beard (1969).

***Neogloboquadrina pachyderma*** (Ehrenberg, 1861)

Ehrenberg, C. G. (1862). Elemente des tiefen Meeresgrundes in Mexikanischen Golfstrome bei Florida: Ober die Tiefgrund-Verhältnisse des Oceans am Eingange der Davisstrasse und bei Island. *Monatsberichte der Koniglichen Preussische Akademie der Wissenschaften zu Berlin*. **1861**: 222-240-275-315.

***Neogloboquadrina incompta*** (Cifelli, 1961)

Cifelli, R. (1961). *Globigerina incompta*, a new species of pelagic foraminifera from the North Atlantic. *Contributions from the Cushman Foundation for Foraminiferal Research*. **12**: 83-86.

***Neogloboquadrina atlantica*** (Berggren, 1972)

Berggren, W. A. (1972). Cenozoic biostratigraphy and paleobiogeography of the North Atlantic. *Initial Reports of the Deep Sea Drilling Project*. **12**: 965-1001.

## References

Bachem, P.E., Risebrobakken, B., and McClymont, E.L. (2016). Sea surface temperature variability in the Norwegian Sea during the late Pliocene linked to subpolar gyre strength and radiative forcing: *Earth and Planetary Science Letters*, v. 446, p. 113-122.

Beard, J. H. (1969). Pleistocene paleotemperature record based on planktonic foraminifers, Gulf of Mexico. *Transactions of the Gulf-Coast Association of Geological Societies*. **19**: 535-553.

Berggren, W. A. (1972). Cenozoic biostratigraphy and paleobiogeography of the North Atlantic. *Initial Reports of the Deep Sea Drilling Project*. **12**: 965-1001.

Blow, W. H. (1969). Late middle Eocene to Recent planktonic foraminiferal biostratigraphy. In, Bronnimann, P. & Renz, H. H. (eds) *Proceedings of the First International Conference on Planktonic Microfossils, Geneva, 1967*. E J Brill, Leiden 380-381.

Bolli, H. M. (1957). Planktonic foraminifera from the Oligocene-Miocene Cipero and Lengua formations of Trinidad, B.W.I. In, Loeblich, A. R. , Jr., Tappan, H., Beckmann, J. P., Bolli, H. M., Montanaro Gallitelli & E. Troelsen, J. C. (eds) *Studies in Foraminifera. U.S. National Museum Bulletin* . **215**: 97-123.

Bolli, H. M. & Bermudez, P. J. (1965). Zonation based on planktonic foraminifera of middle Miocene to Pliocene warm-water sediments. *Bol. Informativo, Asoc. Venez. Geol., Min. Petrol.* **8**(5): 121-149.

Brady, H. B. (1877). Supplementary note on the foraminifera of the Chalk (?) of the New Britain group. *Geological Magazine*. **4**(12): 534-536.

Cifelli, R. (1961). *Globigerina incompta*, a new species of pelagic foraminifera from the North Atlantic. *Contributions from the Cushman Foundation for Foraminiferal Research*. **12**: 83-86.

Cushman, J. A. & Jarvis, P. W. (1936). Three new foraminifera from the Miocene Bowden Marl of Jamaica. *Contributions from the Cushman Laboratory for Foraminiferal Research*. **12**(1): 3-5.

Deshayes, G. P. (1832). *Encyclopedie methodique: Histoire Naturelle des Vers., Tome 2,*. Agasse Imprimeur, Paris. 1-594.

Dowsett, H., Robinson, M., & Foley, K. (2015). A global planktic foraminifer census data set for the Pliocene ocean. *Scientific Data*, 2, 150076. doi:10.1038/sdata.2015.76

Dowsett, H. J., Robinson, M. M., Foley, K. M., Herbert, T. D., Otto-Bliesner, B. L., & Spivey, W. (2019). The mid-Piacenzian of the North Atlantic Ocean. *Stratigraphy*, 16(3), 119-144. doi:10.29041/strat.16.3.119-144

- Dowsett, H. J., Robinson, M. M., & Foley, K. M. (2021). Estimating Piacenzian sea surface temperature using an alkenone-calibrated transfer function. *U.S. Geological Survey Scientific Investigations Report 2021-5051*, 17. doi:10.3133/sir20215051
- Egger, J. G. (1893). Foraminiferen aus Meeresgrundproben, gelothet von 1874 bis 1876 von S. M. Sch. Gazelle. *Abhandlugen der königlichen bayerischen Akademie Wissenschaften zu München, mathematische - naturwissenschaftliche Klasse*. **18**(2): 195-457.
- Ehrenberg, C. G. (1862). Elemente des tiefen Meeresgrundes in Mexikanischen Golfstrome bei Florida: Ober die Tiefgrund-Verhältnisse des Oceans am Eingange der Davisstrasse und bei Island. *Monatsberichte der Koniglichen Preussische Akademie der Wissenschaften zu Berlin*. **1861**: 222-240-275-315.
- Fornasini, C. (1902). Sinossi metodica dei foraminiferi sin qui rinvenuti nella sabbia del lido di Rimini. *Memorie della R. Accademia della scienze dell'Istituto di Bologna*. **10**: +56+-
- Kennett, J. P. (1966). The *Globorotalia crassaformis* bioseries in north Westland and Marlborough, New Zealand,. *Micropaleontology*. **12**: 235-245.
- LeRoy, L. W. (1939). Some small foraminifera ostracoda and otoliths from the Neogene (Miocene) of the Rokan-Tapanoeli area, central Sumatra,. *Natuurk. Tijdschr. Nederl.-Indie*. **99**(6): 215-296.
- Loubere, P.W., & Moss, K.J. (1986). Late Pliocene climatic change and the onset of Northern Hemisphere glaciation as recorded in the northeast Atlantic Ocean. *Geological Society of America Bulletin*, **97**, 818-828.
- d'Orbigny, A. (1826). Tableau methodique de la Classe de Cephalopodes. *Annales des Sciences Naturelles, Paris*. **7**: 245-314.
- d'Orbigny, A. (1839). Foraminifères des Iles Canaries. In, Barker-Webb, P. & Berthelot, S. (eds) *Histoire naturelle des Iles Canaries*. 120-146.
- d'Orbigny, A. (1846). *Foraminifères fossiles du bassin tertiaire de Vienne (Autriche)*. Gide et Compagnie, Paris. 1-312.
- Palmer, D. K. (1945). Notes on the Foraminifera from Bowden, Jamaica. *Bulletins of American Paleontology*. **29**(115): 1-82.
- Parker, W. K., Jones, T. R. & Brady, H. B. (1865). On the nomenclature of the foraminifera. X cont: The Species enumerated by d'Orbigny in the 'Annales des Sciences Naturelles', vol. 7, 1826 (The Species illustrated by Models. *Annals and Magazine of Natural History*. **3**(16): 15-41.
- Reuss, A. E. (1850). Neue Foraminiferen aus den Schichten des Osterreichischen Tertiärbeckens. *Denkschriften der kaiserlichen Akademie der Wissenschaften zu Wien Mathematisch-Naturwissenschaftlichen Classe*. **1**: 365-390.



Schubert, R. J. (1910). Über Foraminiferen und einen Fischotolithen aus dem fossilen Globigerinenschlamm von Neu-Guinea. *Verhandlungen der Kaiserlich-Königlichen Geologischen Reichsanstalt*. **14**: 318-328.

*Globigerina bulloides*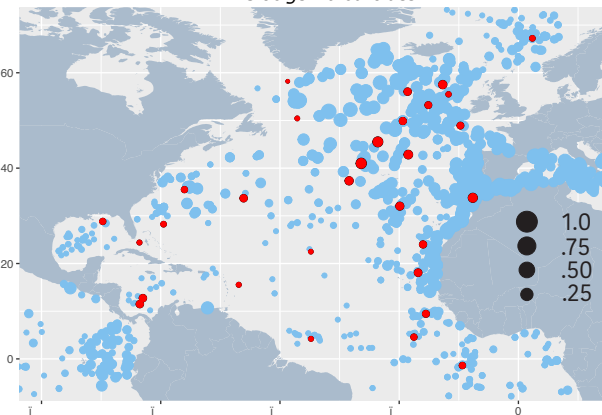*Globigerinita glutinata*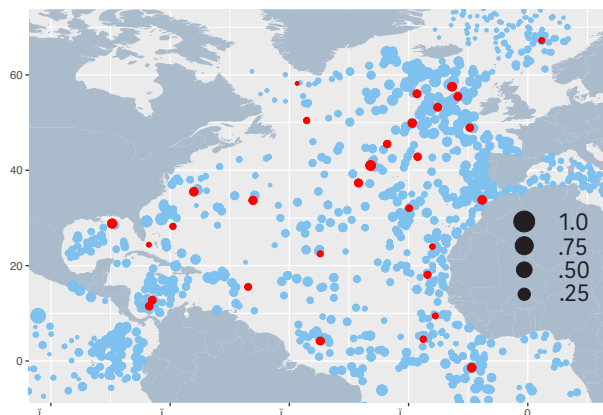*Dentoglobigerina altispira* [Pliocene] • *Trilobatus sacculifer* [Modern]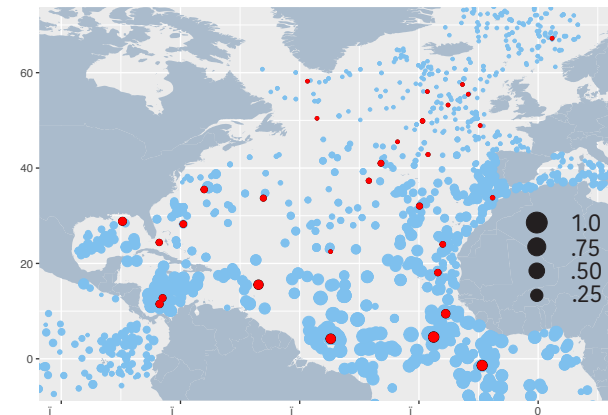*Neogloboquadrina incompta*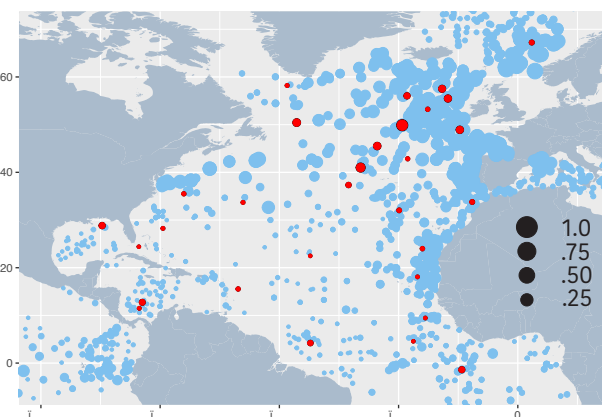*Globorotalia menardii*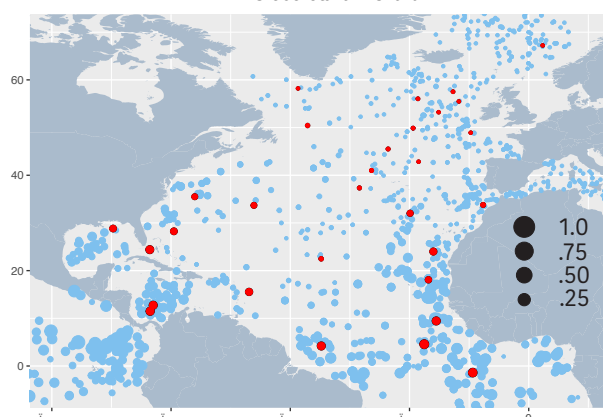*Neogloboquadrina atlantica* [Pliocene] • *Neogloboquadrina pachyderma* [Modern]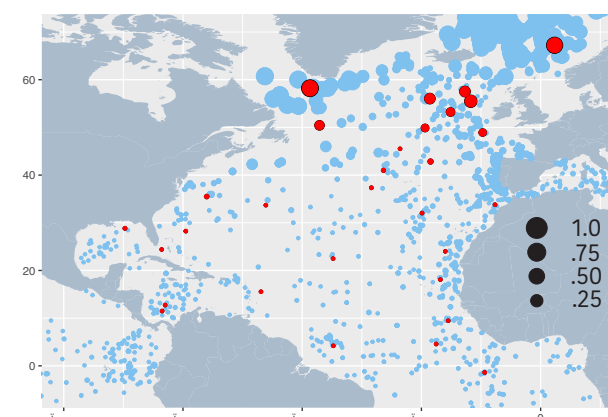*Neogloboquadrina pachyderma*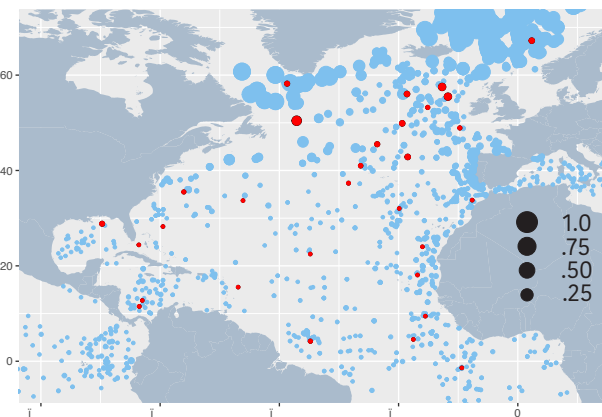*Trilobatus sacculifer*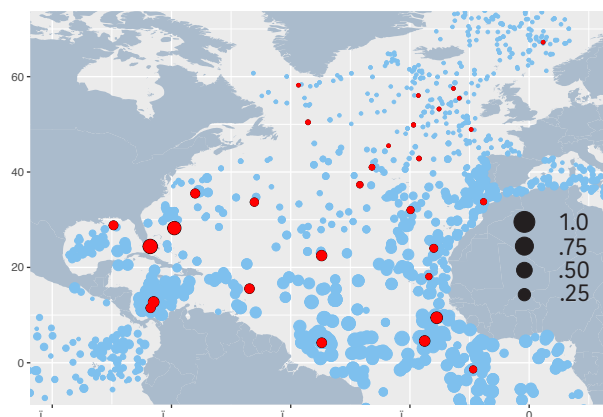*Globoconella puncticulata* [Pliocene] *Globoconella inflata* [Modern]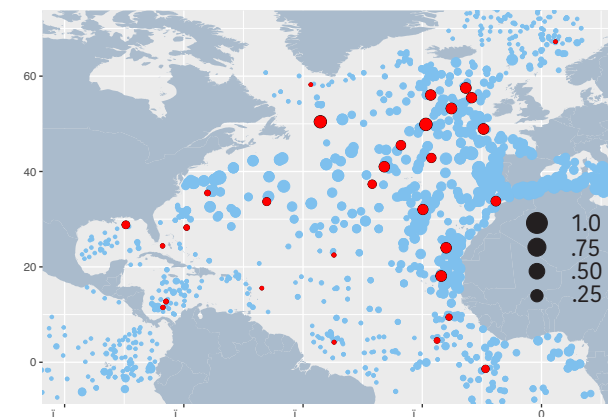

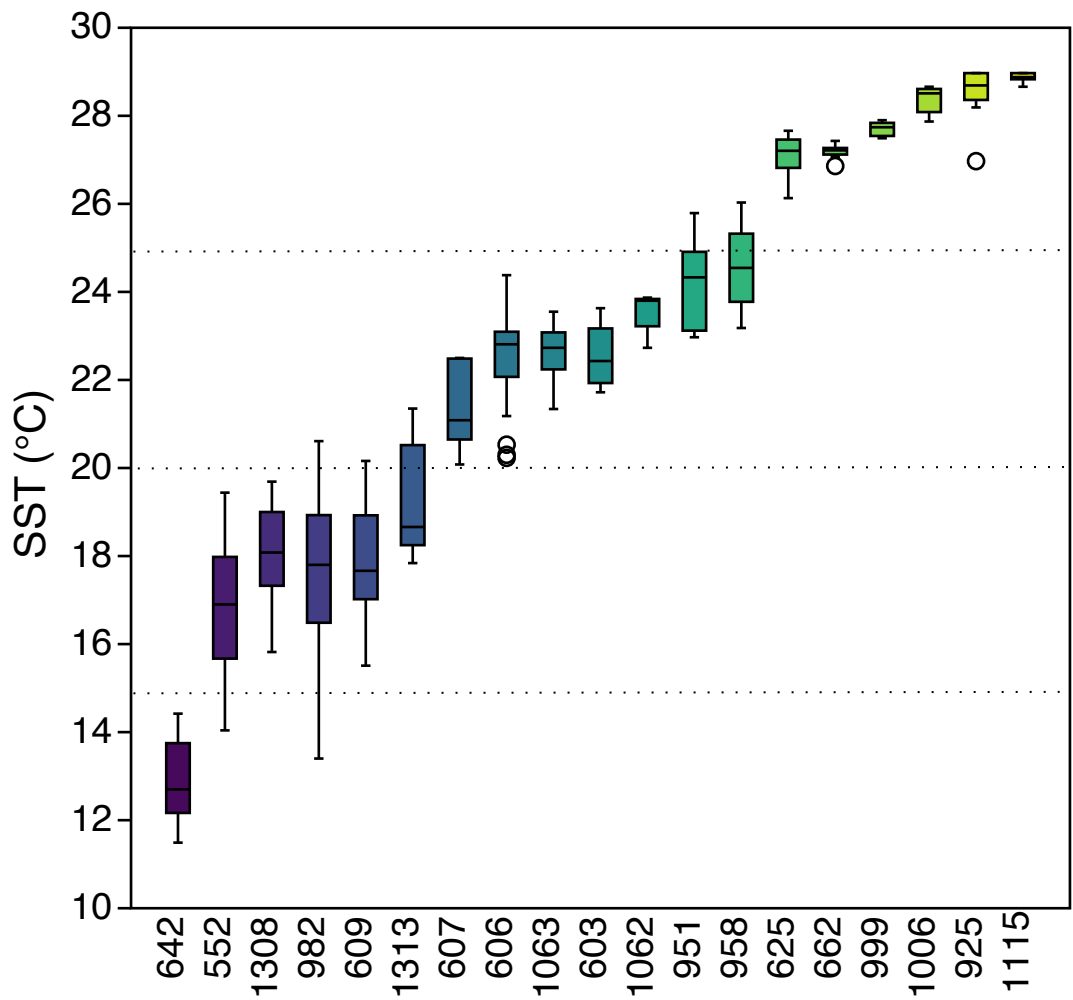

Supplement: s1 [file s1]
